# Supplementary material for: Mental Health and Behavioral Interventions for Children and Adolescents with Incarcerated Parents: A Systematic Review
Source: Springer Nature journal article supplement (doi:10.1007/s10826-023-02757-z), 2024-01-22
Supplement: MOESM3 [file 26651626]

**Figure 3** *Results of Included Studies*

| Study | Main Findings |
| --- | --- |
| Block & Potthast (1998) | All caregivers described some decrease in problematic behaviors, sadness, anger, and worry. Positive effects stemmed more from the activities than from spending time with their mothers. |
| Bruster & Foreman (2012) | All of the families felt that the intervention was beneficial and was a positive source of assistance. 80% of survey respondents strongly agreed or agreed with statements such as "Mentor helps me challenge myself to succeed" and "My mentor helps me feel good about myself". |
| Fry-Greier & Hellman (2016) | One-way ANOVA for externalizing problems (F (1,51) =7.86, p=.007)* and child total problems (F (1,51) =8.80, p=.005) * are statistically significant. Effect sizes show that parental sentencing has a moderate effect size for both externalizing (d= -0.74) and total behavioral problems (d= -0.78). |
| Lopez & Bhat (2007) | Students who participated in this group found that the connections and support given to one another served as a positive element from the intervention. |
| Poehlmann-Tynan et al. (2021) | Educational materials main effect was not statistically significant on children positive (F=2.343, p=.131) or negative (F=2.282, p=.136) behaviors during jail visits. What children were told about their parent's incarceration had a medium effect size on their positive affect and behaviors (F=4.063, p=.048) *. The RR statistic (RR=2.055 95% CI [1.542, 2.737]) * shows that caregivers in the intervention group were twice as likely to tell the child a developmentally appropriate and honest explanation. |
| Jalali, Hashemi & Hasani (2019) | Independent t-test shows a significant difference between the depression scores of the experimental group compared to the control group (t=22.27 p=0.001) *. Covariance analysis shows a significant difference between the anxiety scores of the experimental group compared to the control group (f=750.72 p=<0.001)*. |
| Shlafer et al. (2009) | Mean differences of CBCL internalizing scores (M=51.28, SD=15.29) and externalizing scores at 6 months (M=55.83, SD=13.87) revealed no significant differences in symptoms. However, caregivers reported noticing changes in children's behaviors and they attribute these changes to the participation in the program. More frequent contact was significantly associated with less externalizing symptoms (partial r= -.60, p=.02)* and less internalizing symptoms (partial r= -.58, p=.03)* at 6 months. |
| ICF International (2011) | Compared to the control group, the treatment group reported better self-esteem (p=0.04, ES=0.37) * and sense of future (p<.001, ES=0.43)*. Children in the treatment group reported more positive feelings about themselves compared to the control group with significant differences at 18 months (p<0.05)*.Treatment group had a lower sense of future at baseline (4.0) compared to control group (4.2) but this increased at 6 months to reach a significant difference compared to the control group (p<0.01) *. Treatment group had a lower rate of suspensions at 6 months (6%) and at 12 months (8%) compared to the control group (11.6%) but the difference wasn't significant (p=0.70, ES= -0.03). |
| Conway & Keays (2015) | BBBS group showed no significant differences on the Problem Severity and Functioning scales, yet a significant decrease (p<0.05) * was found on the BERS Strengths scale (7 months= 105.5, 13 months= 103). FIC group had a significant decrease (p<0.05) * on the Ohio Scale of Problem Severity (7 months= 9) but significantly increased again (13 months= 13.5). Functioning significantly increased (p<0.05) * (7 months= 66.8) and then slightly decreased (13 months= 64.8). On the BERS Strengths scale, scores increased significantly (p<0.05) * (7 months= 112.9) and slightly decreased (13 months= 111.4). Comparative analyses showed a statistically significant interaction effect on the Problem Severity measure (F=7.12, p<.05) *and the Functioning measure of the Ohio Scale (F=5.74, p<.05) *, and the BERS Strengths score (F=10.39, p<.05) * indicating differences between the types of services. |
| Miller et al. (2013) | No changes in BERS Family Involvement (F= 0.31), Interpersonal Strength (F= 0.01), POCA Social Competence (F= 3.18), Behavior Problems (F= 2.44), Aggression (F= 0.92), or Concentration Problems (F= 0.8). There was a significant decrease in caregiver-reported POCA overt aggression/criminal behavior from pre-test to follow-up (t= 3.14, p<0.05) *. |
| Will et al. (2006) | Attendance rate for school year 2003-2004 was 94.6% with SD= 6 and for the 2004-2005 school year was 92% with SD= 11.1. T-test found no significant difference between the two time frames. Two clients in the 2003-2004 group who had previous contact with DJJ did not have any new contact since they entered the program. However, two other clients did have contact. Two clients in the 2004-2005 group who had previous contact with DJJ did not have any new contact since they entered the program, but two other clients did have contact after entrance. During focus groups with children, all claimed they benefited from increased visitation during therapy. |
| Laakso & Nygaard (2012) | Through thematic analysis, 6 positive outcomes were identified from the interviews: increased self-confidence, more sociability, greater openness, evidence of trust, improved school performance, and signs of happiness. The duration of matches and similar attributes between the child and the mentor are positively correlated with emotional closeness. |
| King-White (2012) | One-way analysis of variance was conducted. Post-test scores on delinquency (F= 1.2, p= 0.298, r= -0.315), self-esteem (F= 0.643, p= 0.443, r= 0.24), attendance rates (F= 0.081, p= 0.782, r= 0.08), and aggressive behavior (F= 1, p= 0.342, r= -0.582) for CHIPS group and control group showed no significant differences. |
| Morris (2017) | BBBS program had a significant effect on CIP over time but compared to the FFCWS average the effect is non-significant. After one year of mentoring, the BBBS group and the FFCWS average showed statistically non-significant difference in deviant behavior (F= 0.19, p= 0.668). The BBBS group self-reported levels of sadness compared to the FFCWS average showed statistically significant differences (F= 10.35, p= 0.001) *. At one year, there was no significant effect of mentoring on deviance (t-value= 0.536 and 0.438). BBBS group had consistently declining levels of sadness with ATT being negative at 6 months (t-value=-1.042 and -1.248) * and one year (t-value=-1.011 and -1.201) *. |
| Goshin (2010) | No significant differences were found between the prison nursery group and the FFCWS group on the Aggressive subscale (F= 1.17, p= 0.28) and the ADH subscale (F= 1.09, p= 0.30). The effect size of the intervention on the Aggressive (d= 0.22) and ADH (d= 0.19) scales was low. Significant differences were found between both groups on the Anxious/Depressed subscale (F= 5.63, p= 0.02) *. Mean rank differences were significant for the Withdrawn subscale (z= -1.92, p= 0.05) *. No significant mean rank differences were found for the Behavior Competence subscale (z= -0.95, p= 0.34). |
| Springer, Lynch & Rubin (2000) | Wilcoxon test revealed a significant difference between pre- and post-test results on the HSS for the intervention group (α= 0.05, p= 0.005)* and no significant difference between pre-and post-test scores for the control group (α= 0.05, p= 0.08). No significant differences were found between the two groups on their post-test scores (F= 1.074, df= 1). The group intervention had a moderate effect size on the outcome measure (ES= 0.57). |

***Key:*** CASM= Children with Alternative Sentencing Mothers, M= Mean, SD= Standard Deviation, CRIM= Children with Regularly Incarcerated Mothers, ANOVA= Analysis of Variance, CBCL= Child Behavior Checklist, BBBS= Big Brothers Big Sisters, BERS= Behavioral and Emotional Rating Scale, FIC= Families in Crisis, POCA= Parent Observation of Child Adaptation, DJJ= Department of Juvenile Justice, CUP= Children United with Parents, CHIPS= Children Having Incarcerated Parents Succeeding, CIP= Children of Incarcerated Parents, FFCWS= Fragile Families Child Wellbeing Study, ATT= Average Treatment Effect on Treated, ADH= Attention Deficit/Hyperactivity, HSS= Hare Self-Esteem Scale.

***Note:*** Effects explicitly reported as statistically significant in the article are marked with an *
